# Supplementary material for: Specification of the Okadaic Acid Equivalent for Okadaic Acid, Dinophysistoxin-1, and Dinophysistoxin-2 Based on Protein Phosphatase 2A Inhibition and Cytotoxicity Assays Using Neuro 2A Cell Line
Source: MDPI journal article supplement (doi:10.3390/jmse9101140), 2021-10-17
Supplement: s1 [file s1]

**Table S1. Dilution of CRM-OA-d (10.4µM) for PP2A inhibition assay**

| Std No. | OA nM | dilution                    | OA nM / well |
|---------|-------|-----------------------------|--------------|
| ①       | 200   | CRM OA-d 10 µL + SB* 490 µL | 40           |
| ②       | 50    | Std① 100 µL + SB* 300 µL    | 10           |
| ③       | 20    | Std① 40 µL + SB* 360 µL     | 4            |
| ④       | 5     | Std② 40 µL + SB* 360 µL     | 1            |
| ⑤       | 2     | Std③ 40 µL + SB* 360 µL     | 0.4          |
| ⑥       | 0.5   | Std④ 40 µL + SB* 360 µL     | 0.1          |
| ⑦       | 0.2   | Std⑤ 40 µL + SB* 360 µL     | 0.04         |
| ⑧       | 0.05  | Std⑥ 40 µL + SB* 360 µL     | 0.01         |
| ⑨       | 0.02  | Std⑦ 40 µL + SB* 360 µL     | 0.004        |
| ⑩       | 0.005 | Std⑧ 40 µL + SB* 360 µL     | 0.001        |

\* PP2A inhibition assay sample buffer (34mM MgCl<sub>2</sub>, 4mM EDTA, 10% EtOH, 0.5% Tween60, Tris-HCl pH8.4)

**Table S2. Dilution of CRM-DTX1-b (10.4µM) for PP2A inhibition assay**

| Std No. | DTX1 nM | dilution                      | DTX1 nM / well |
|---------|---------|-------------------------------|----------------|
| ①       | 200     | CRM DTX1-b 10 µL + SB* 490 µL | 40             |
| ②       | 50      | Std① 100 µL + SB* 300 µL      | 10             |
| ③       | 20      | Std① 40 µL + SB* 360 µL       | 4              |
| ④       | 5       | Std② 40 µL + SB* 360 µL       | 1              |
| ⑤       | 2       | Std③ 40 µL + SB* 360 µL       | 0.4            |
| ⑥       | 0.5     | Std④ 40 µL + SB* 360 µL       | 0.1            |
| ⑦       | 0.2     | Std⑤ 40 µL + SB* 360 µL       | 0.04           |
| ⑧       | 0.05    | Std⑥ 40 µL + SB* 360 µL       | 0.01           |
| ⑨       | 0.02    | Std⑦ 40 µL + SB* 360 µL       | 0.004          |
| ⑩       | 0.005   | Std⑧ 40 µL + SB* 360 µL       | 0.001          |

\* PP2A inhibition assay sample buffer (34mM MgCl<sub>2</sub>, 4mM EDTA, 10% EtOH, 0.5% Tween60, Tris-HCl pH8.4)

**Table S3. Dilution of CRM-DTX2-b (4.7µM) for PP2A inhibition assay**

| Std No. | DTX2 nM | dilution                      | DTX2 nM / well |
|---------|---------|-------------------------------|----------------|
| ①       | 200     | CRM DTX2-b 22 µL + SB* 478 µL | 40             |
| ②       | 50      | Std① 100 µL + SB* 300 µL      | 10             |
| ③       | 20      | Std① 40 µL + SB* 360 µL       | 4              |
| ④       | 5       | Std② 40 µL + SB* 360 µL       | 1              |
| ⑤       | 2       | Std③ 40 µL + SB* 360 µL       | 0.4            |
| ⑥       | 0.5     | Std④ 40 µL + SB* 360 µL       | 0.1            |
| ⑦       | 0.2     | Std⑤ 40 µL + SB* 360 µL       | 0.04           |
| ⑧       | 0.05    | Std⑥ 40 µL + SB* 360 µL       | 0.01           |
| ⑨       | 0.02    | Std⑦ 40 µL + SB* 360 µL       | 0.004          |
| ⑩       | 0.005   | Std⑧ 40 µL + SB* 360 µL       | 0.001          |

\* PP2A inhibition assay sample buffer (34mM MgCl<sub>2</sub>, 4mM EDTA, 10% EtOH, 0.5% Tween60, Tris-HCl pH8.4)

**Table S4. Dilution of CRM-OA-d (10.4µM) for neuro-2a cell viability assay**

| Std No. | OA µM | dilution                           | OA µM / well |
|---------|-------|------------------------------------|--------------|
| ①       | 6     | CRM-OA-d 36.6 µL + Medium* 25.4 µL | 300          |
| ②       | 2     | Std① 15 µL + Medium* 30 µL         | 100          |
| ③       | 0.6   | Std① 5 µL + Medium* 45 µL          | 30           |
| ④       | 0.2   | Std② 5 µL + Medium* 45 µL          | 10           |
| ⑤       | 0.06  | Std③ 5 µL + Medium* 45 µL          | 3            |
| ⑥       | 0.02  | Std④ 5 µL + Medium* 45 µL          | 1            |

\* RPMI-1640 medium (5% FBS, 1mM sodium pyruvate, 1% Penicillin-Streptomycin Solution)

**Table S5. Dilution of CRM-DTX1-b (10.4µM) for neuro-2a cell viability assay**

| Std No. | DTX1 µM | dilution                             | DTX1 µM / well |
|---------|---------|--------------------------------------|----------------|
| ①       | 6       | CRM-DTX1-b 36.6 µL + Medium* 25.4 µL | 300            |
| ②       | 2       | Std① 15 µL + Medium* 30 µL           | 100            |
| ③       | 0.6     | Std① 5 µL + Medium* 45 µL            | 30             |
| ④       | 0.2     | Std② 5 µL + Medium* 45 µL            | 10             |
| ⑤       | 0.06    | Std③ 5 µL + Medium* 45 µL            | 3              |
| ⑥       | 0.02    | Std④ 5 µL + Medium* 45 µL            | 1              |

\* RPMI-1640 medium (5% FBS, 1mM sodium pyruvate, 1% Penicillin-Streptomycin Solution)

Table S6. Dilution of CRM-DTX2-b (4.7µM) for neuro-2a cell viability assay

| Std No. | DTX2 µM | dilution                             | DTX2 µM / well |
|---------|---------|--------------------------------------|----------------|
| ①       | 4       | CRM-DTX2-b 59.5 µL + Medium* 10.5 µL | 200            |
| ②       | 2       | Std① 25 µL + Medium* 25 µL           | 100            |
| ③       | 0.6     | Std① 7.5 µL + Medium* 42.5 µL        | 30             |
| ④       | 0.2     | Std② 5 µL + Medium* 45 µL            | 10             |
| ⑤       | 0.06    | Std③ 5 µL + Medium* 45 µL            | 3              |
| ⑥       | 0.02    | Std④ 5 µL + Medium* 45 µL            | 1              |

\* RPMI-1640 medium (5% FBS, 1mM sodium pyruvate, 1% Penicillin-Streptomycin Solution)

Table S7. OAs concentration in diluted CRM-DSP-MUS-c for PP2A inhibition assay

| Sample no. | OAs (µg/g ) |       |       |
|------------|-------------|-------|-------|
|            | OA          | DTX1  | DTX2  |
| 1          | 0.214       | 0.214 | 0.172 |
| 2          | 0.107       | 0.107 | 0.086 |
| 3          | 0.053       | 0.053 | 0.043 |
| 4          | 0.240       | 0.110 | 0.220 |
| 5          | 0.120       | 0.055 | 0.110 |
| 6          | 0.060       | 0.028 | 0.055 |

Sample no. 1, 2, 3 = unhydrolyzed, 4, 5, 6 = hydrolyzed samples.

Table S8. Total OA equivalents (µg /g whole meat) expected according to the OApp2 shown in Table 1 and the OA concentrations shown in Table S7

| Sample no. | OA equivalents (µg/g ) |        |        |        |
|------------|------------------------|--------|--------|--------|
|            | OA                     | DTX1   | DTX2   | Total  |
| 1          | 0.214                  | 0.3424 | 0.0516 | 0.6080 |
| 2          | 0.107                  | 0.1712 | 0.0258 | 0.3040 |
| 3          | 0.053                  | 0.0848 | 0.0129 | 0.1507 |
| 4          | 0.240                  | 0.1760 | 0.0660 | 0.4820 |
| 5          | 0.120                  | 0.0880 | 0.0330 | 0.2410 |
| 6          | 0.060                  | 0.0448 | 0.0165 | 0.1213 |

Sample no. 1, 2, 3 = unhydrolyzed, 4, 5, 6 = hydrolyzed samples.
